# Supplementary material for: Gastric Cancer with Ovarian Metastasis Exhibits Distinct Transcriptomic and Pharmacogenomic Signatures Revealing Immune Metabolic Vulnerabilities
Source: Research Square preprint supplement (doi:10.21203/rs.3.rs-7863401/v1), 2025-11-18
Supplement: Supplementary file 1 [file daef86b5083558e536840925.docx]

Supporting Information

**Distinct Transcriptomic and Pharmacogenomic Signatures of Gastric Cancer with Ovarian Metastasis Reveal Immune-Metabolic Vulnerabilities**

Tong Wang 1, Dan Liu 2, Haining Liu 1, Jingyuan Wang 1, *

1. Department of Reproduction, Qingdao Municipal Hospital, Qingdao, 266071, China.

2. Obstetrics Department, Qingdao Municipal Hospital, Qingdao, 266071, China.

3. Department of Reproduction, Qingdao Municipal Hospital, Qingdao, 266071, China.

Corresponding Author:

Jingyuan Wang, M. D. Ph. D, Department of Reproduction, Qingdao Municipal Hospital, Qingdao, 266071, China.

E-mail: hainingliu_sd@163.com


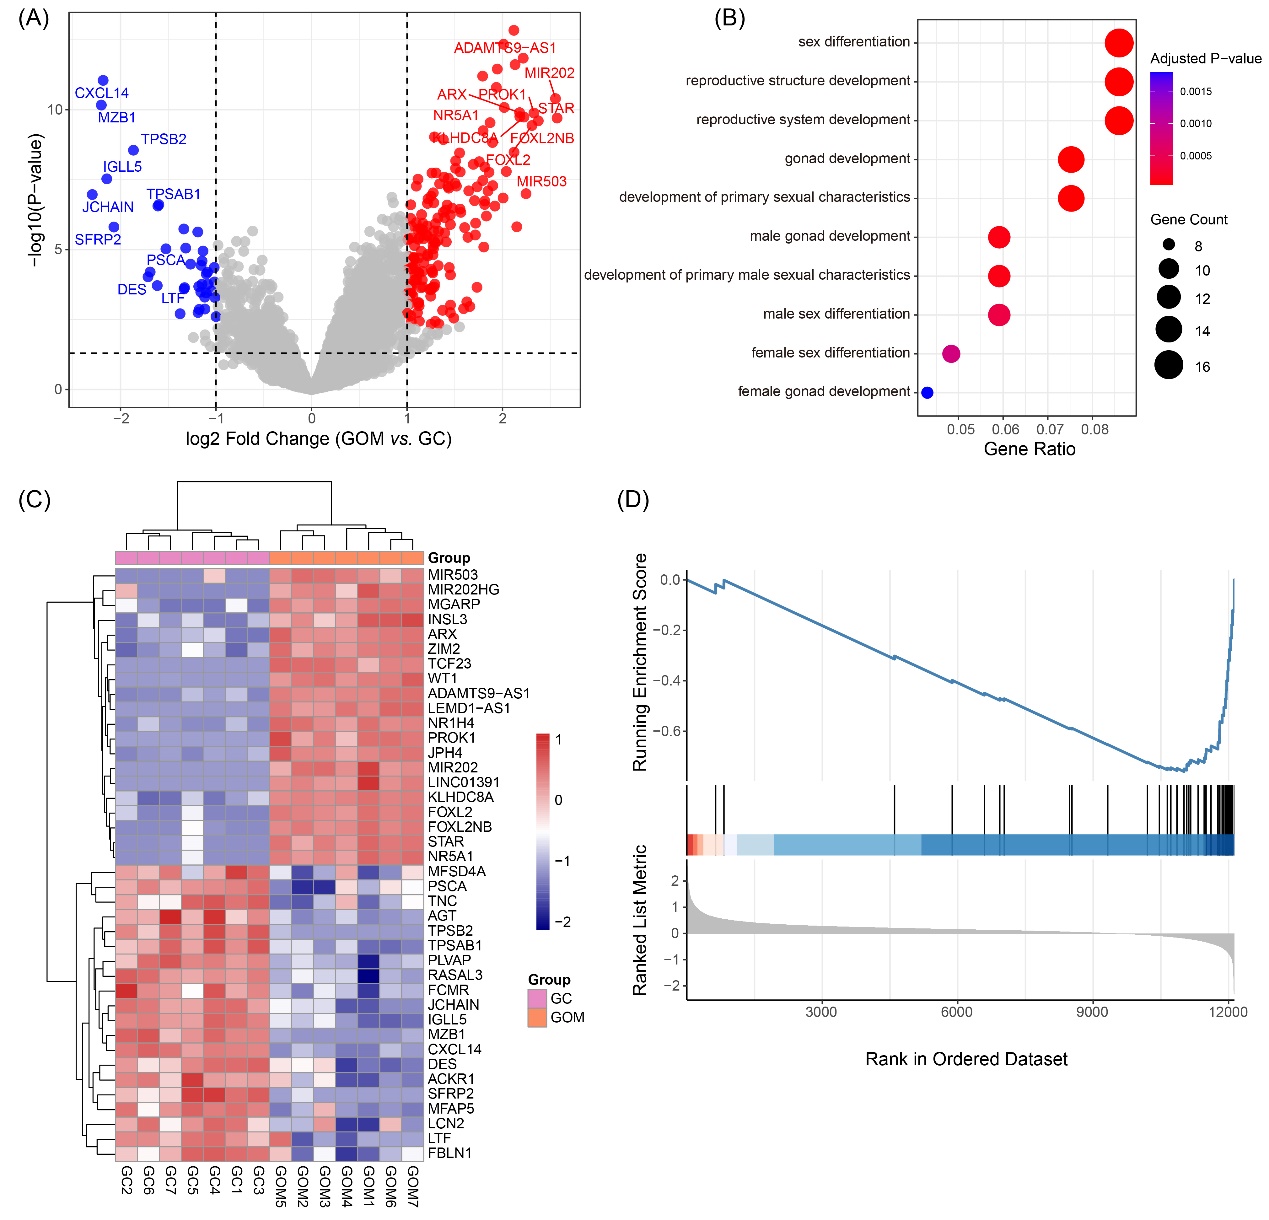


**Supplementary Figure S1. Differential expression and pathway enrichment analysis between GOM and GC. (A)** Volcano plot showing differentially expressed genes (DEGs) between GOM and GC. Red and blue dots indicate significantly upregulated and downregulated genes in GOM respectively (|log₂FC| ≥ 1, adjusted p < 0.05). **(B)** Gene Ontology (GO) enrichment analysis for upregulated genes in GOM compared to GC. Key enriched biological processes include immune regulation and cell adhesion. **(C)** Heatmap of top differentially expressed genes between GOM and GC, revealing a clear separation of sample clusters. **(D)** GSEA plot showing pathway-level suppression of antigen presentation and adaptive immune responses in GOM compared to GC.


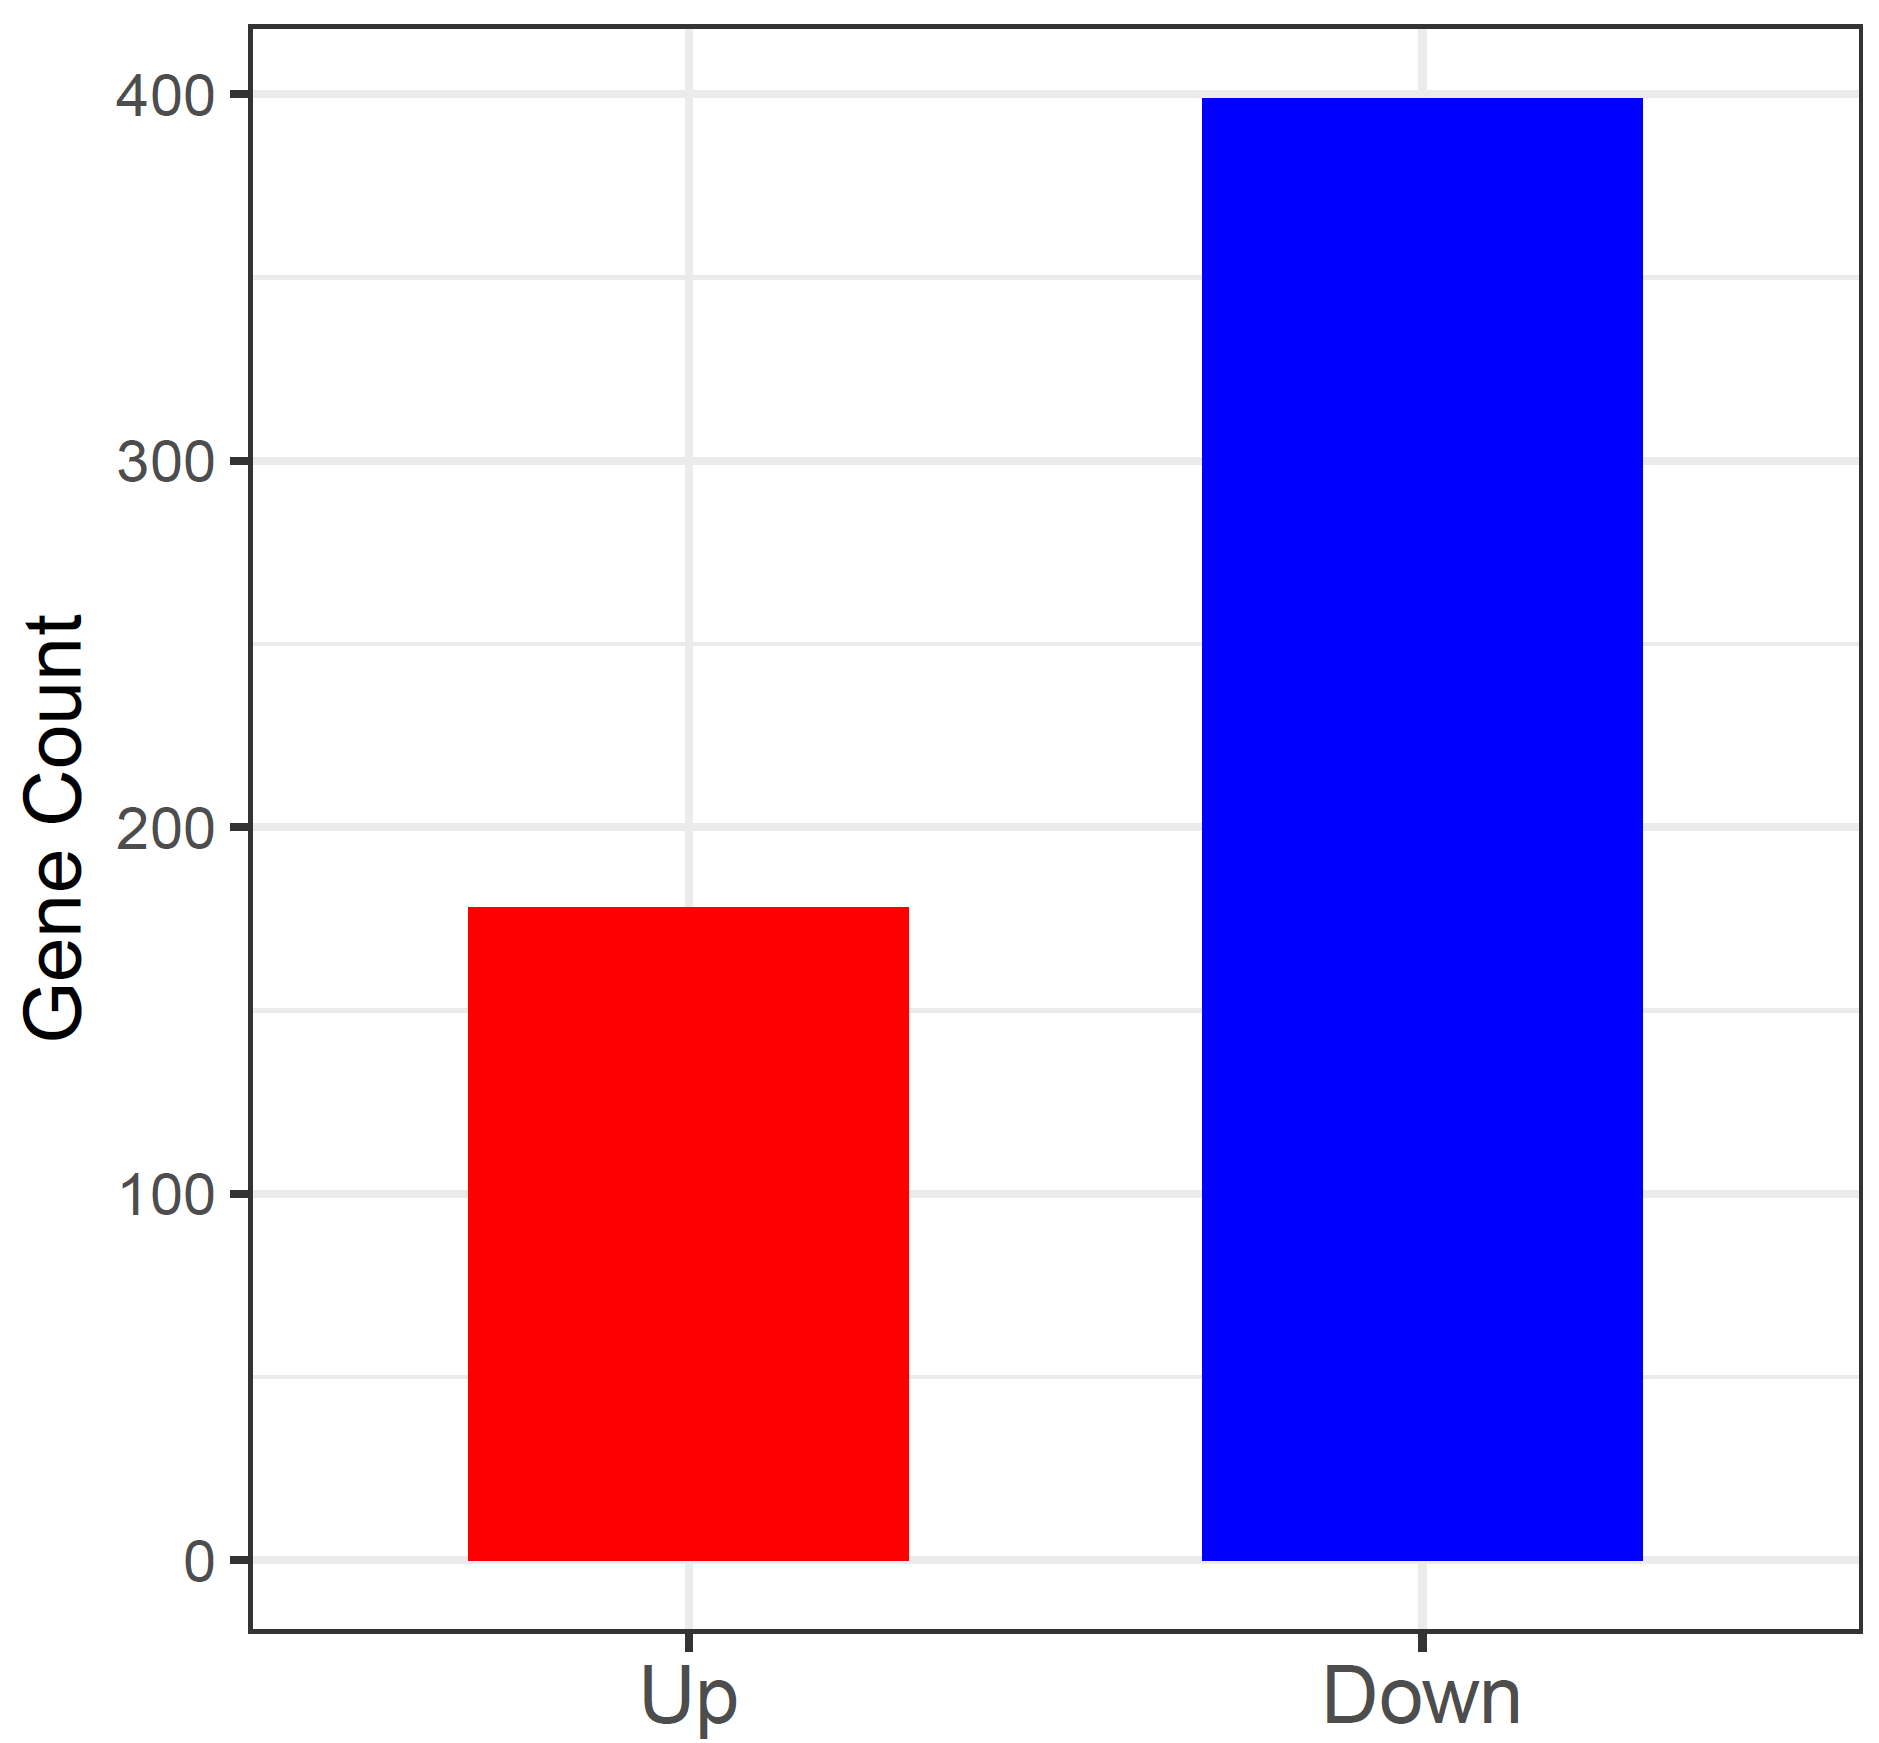


**Supplementary Figure 2. Number of differentially expressed genes (DEGs) in GOM vs. OC comparison.** Bar plot illustrating the number of upregulated (red) and downregulated (blue) genes identified in gastric cancer with ovarian metastasis (GOM) compared to primary ovarian cancer (OC). A total of approximately 170 genes were upregulated and 400 were downregulated (|log₂ fold change| ≥ 1, adjusted p < 0.05), highlighting a predominantly repressive transcriptomic reprogramming in GOM relative to OC.


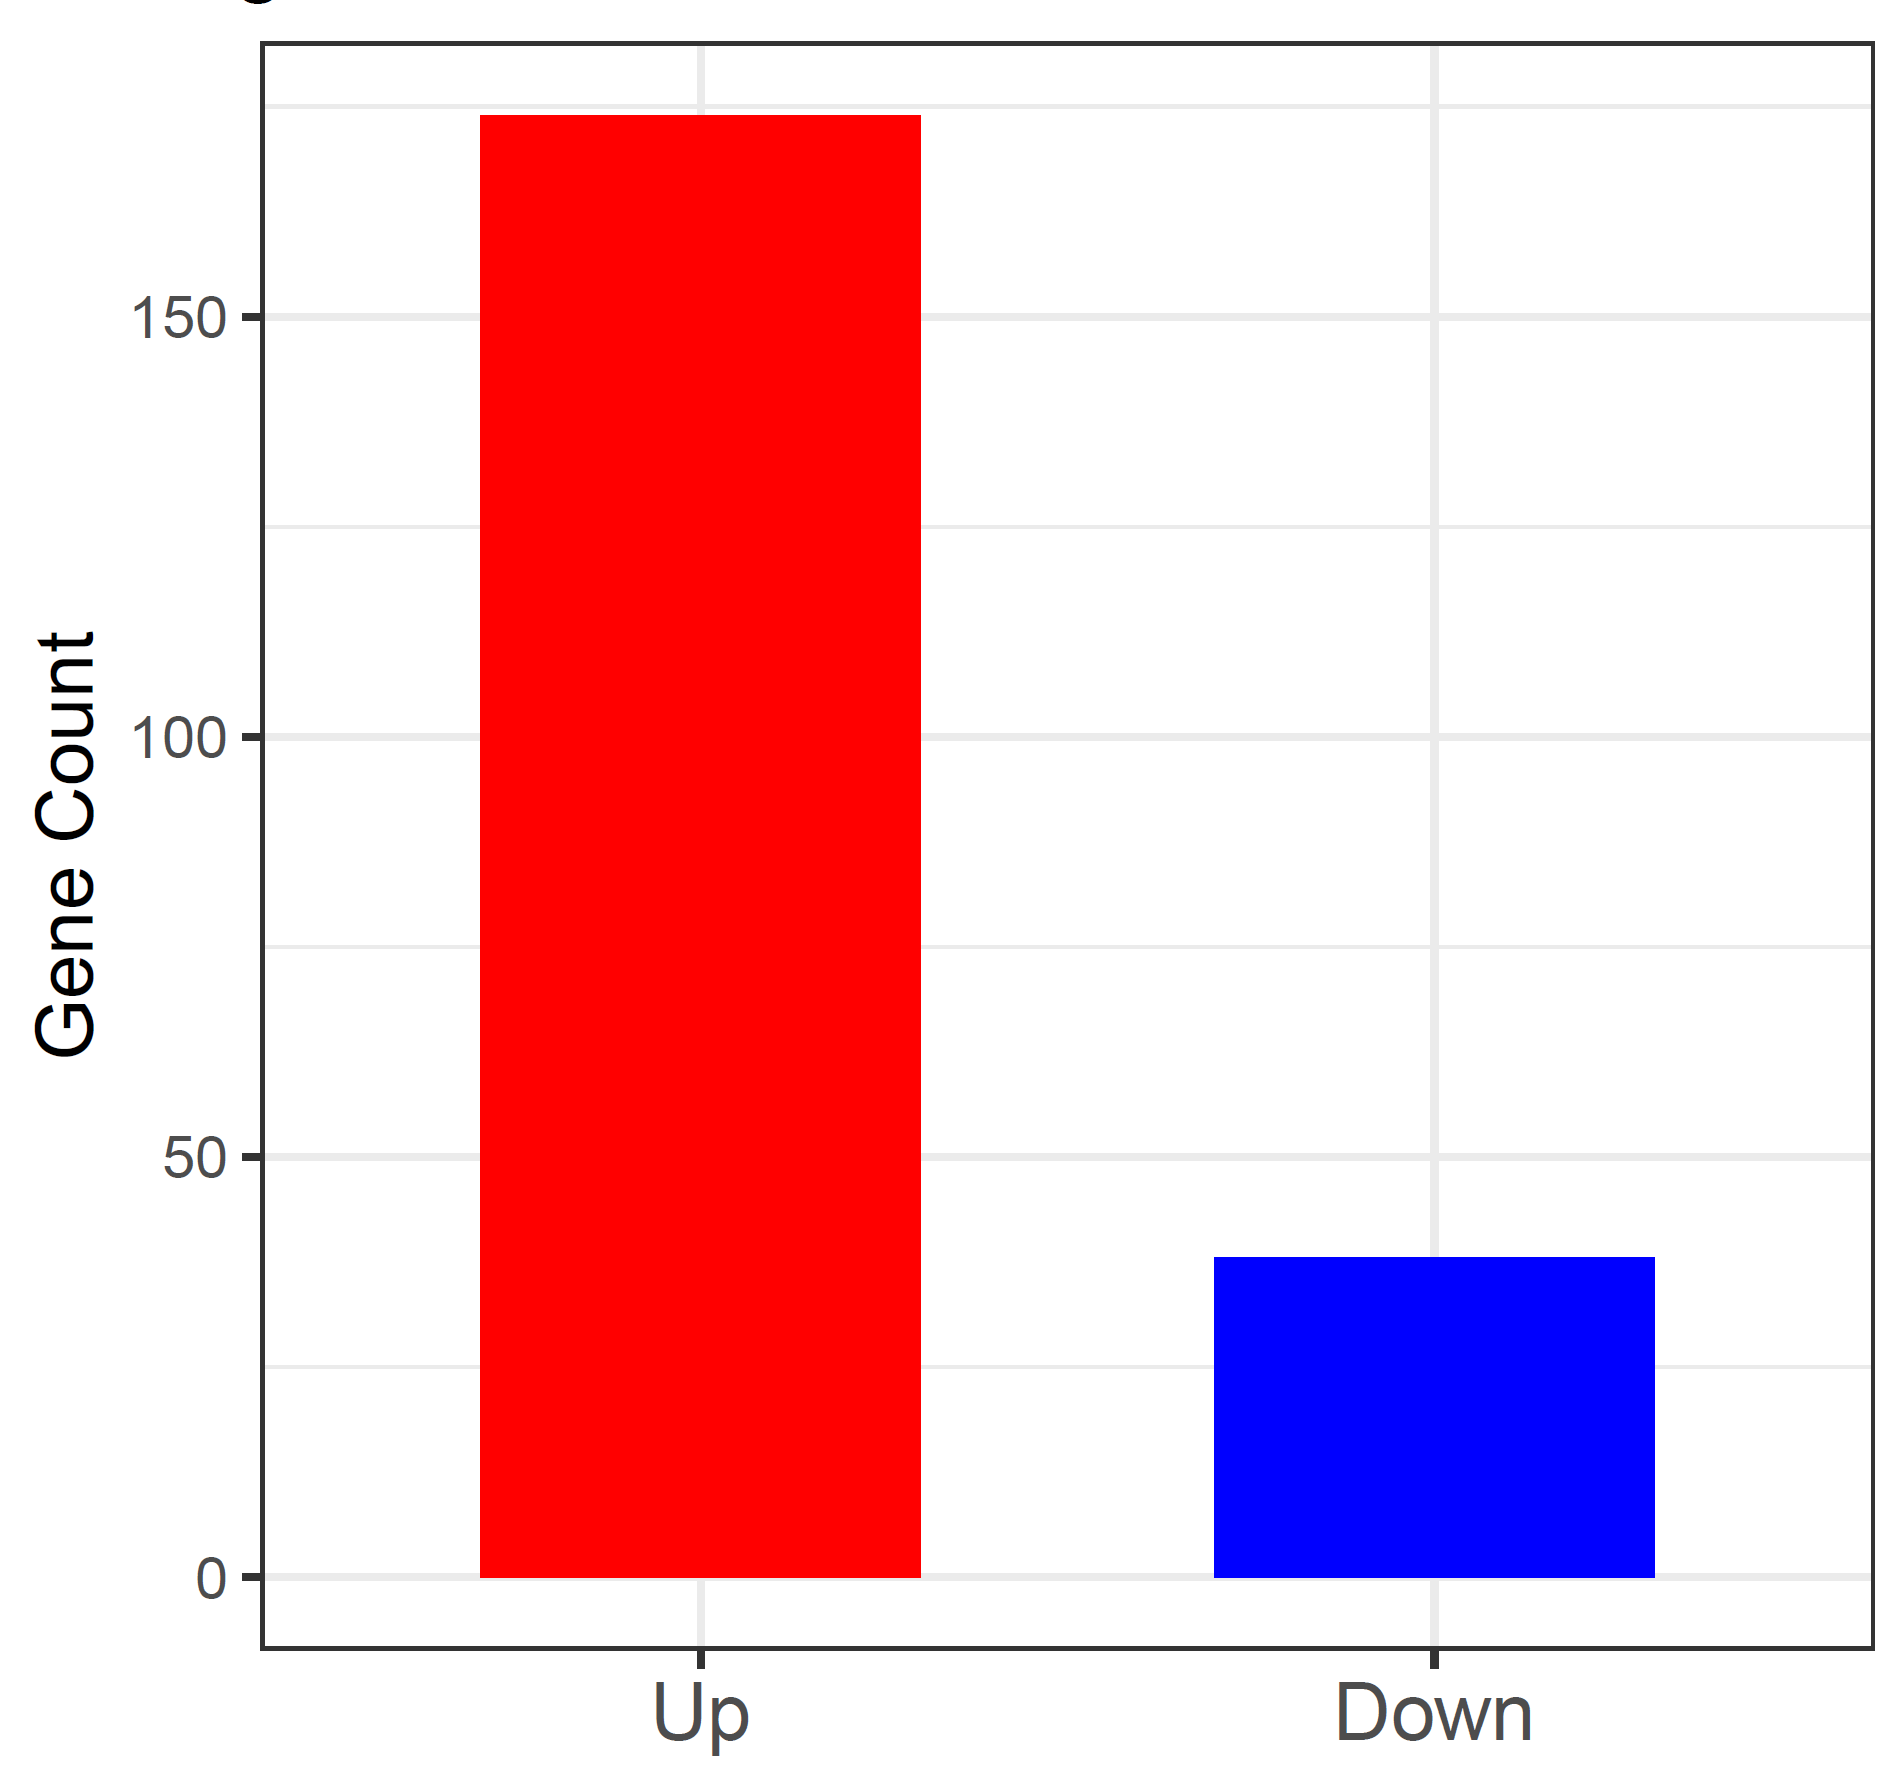


**Supplementary Figure 3. Number of differentially expressed genes (DEGs) in GOM vs. GC comparison.** Bar plot showing the distribution of DEGs between gastric cancer with ovarian metastasis (GOM) and primary gastric cancer (GC). A total of approximately 175 genes were upregulated (red) and ~35 were downregulated (blue) in GOM (|log₂ fold change| ≥ 1, adjusted p < 0.05), suggesting a transcriptional shift associated with metastatic adaptation.

**Table S1. Sample Information Summary**

| **Group** | **Tissue Type** | **Sample Size (n)** | **Dataset** |
| --- | --- | --- | --- |
| GC | Gastric Cancer | 7 | GSE223426 |
| GOM | Gastric Cancer with Ovarian Metastasis | 7 | GSE223426 |
| OC | Primary Ovarian Cancer | 11 | GSE191139 |
| ON | Normal Ovary | 4 | GSE191139 |

**Table S2. Top 10 Up- and Downregulated DEGs in GOM vs OC**

| **Gene Symbol** | **log₂FC** | **adj. p-value** | **Regulation (↑/↓)** | **Gene Type Function Summary** |
| --- | --- | --- | --- | --- |
| SCARNA13 | 2.85 | 1.2e-05 | ↑ | snoRNA RNA modification |
| HLA-H | -3.10 | 4.6e-07 | ↓ | MHC-I Antigen presentation |
| SNORD17 | 2.63 | 1.8e-04 | ↑ | snoRNA Ribosomal RNA modification |
| WFDC2 | -2.94 | 3.1e-06 | ↓ | Secreted protein Tumor marker |
| MIR3619 | 2.48 | 2.2e-04 | ↑ | lncRNA Immune regulation |
| VIM-AS1 | -2.50 | 9.9e-05 | ↓ | lncRNA EMT-associated antisense |
| RMRP | 2.33 | 3.4e-04 | ↑ | lncRNA Mitochondrial RNA processing |
| CIITA | -2.60 | 1.1e-06 | ↓ | Transactivator MHC class II expression |
| SNORA73B | 2.12 | 5.7e-04 | ↑ | snoRNA RNA pseudouridylation |
| HLA-DQB1 | -2.83 | 6.4e-06 | ↓ | MHC-II Antigen presentation |

**Table 3. Shared DEGs Between GOM vs OC and GOM vs G**

| **Gene Symbol** | **log₂FC (GOM vs OC)** | **log₂FC (GOM vs GC)** | **Regulation Consistency Functional Annotation** |
| --- | --- | --- | --- |
| NR1H4 | -1.7 | -1.9 | Down in both FXR, bile acid metabolism |
| ENPP6 | -2.0 | -1.8 | Down in both Lipid metabolism |
| RHBG | -1.6 | -2.2 | Down in both Ammonium transport |
| ADAMTS9-AS1 | -1.9 | -1.5 | Down in both Tumor suppressor lncRNA |
| TCERG1L | -1.4 | -1.6 | Down in both Transcription elongation |
| FOSB | -2.3 | -2.1 | Down in both AP-1 transcription factor |
| SLC7A14 | -1.8 | -1.7 | Down in both Solute carrier family |
| PDZK1IP1 | -1.5 | -2.0 | Down in both Scaffold protein |
| MSLN | -2.1 | -2.3 | Down in both Cell adhesion |
| LCN2 | -2.2 | -1.9 | Down in both Iron transport and inflammation |

**Table S4. Drug Sensitivity Scores for GOM vs OC**

| **Drug Name** | **Drug Class** | **ssGSEA Score (GOM)** | **ssGSEA Score (OC)** | **p-value (Wilcoxon)** |
| --- | --- | --- | --- | --- |
| Dinaciclib | CDK1/2 inhibitor | 0.75 ± 0.06 | 0.45 ± 0.04 | <0.001 |
| Romidepsin | HDAC inhibitor | 0.68 ± 0.05 | 0.51 ± 0.03 | <0.01 |
| Sepantronium bromide | Survivin inhibitor | 0.61 ± 0.04 | 0.48 ± 0.04 | <0.01 |
| SN-38 | Topo I inhibitor | 0.72 ± 0.07 | 0.50 ± 0.05 | <0.01 |

**Table S5. Correlation of Hub Genes with Drug Sensitivity Signatures**

| **Hub Gene** | **Romidepsin** | **SN-38** | **Dinaciclib** | **Sepantronium bromide** |
| --- | --- | --- | --- | --- |
| NR1H4 | +0.62 *** | +0.59 ** | -0.55 ** | -0.61 *** |
| RHBG | +0.49 ** | +0.44 * | -0.53 ** | -0.47 * |
